# Supplementary material
Source: PubMed Central journal article supplement (PMC4380617)
Supplement: NIHMS667293-supplement.pdf [file NIHMS667293-supplement.pdf]

|         |                                                                                                                           |     |
|---------|---------------------------------------------------------------------------------------------------------------------------|-----|
| Zuo1    | M F S L P T L T S D I T V E V N S S A T K T P F V R R R V E P V G K F F L Q H A Q R T L R N H T W S E F E R I             | 55  |
| DNAJC2  | M L L L P S A A D G R G T A I T H A L T S A S T L C Q - V E P V G R W F E A F V K R R N R - N A S A S F Q E L             | 53  |
| Jj1     | - - - - - - - - - - - - - - - - - - - - - - - - - - - - - - - - - - - - - - - - - - - - - - - - - - - -                   | 50  |
| DNAJC21 | - - - - - - - - - - - - - - - - - - - - - - - - - - - - - - - - - - - - - - - - - - - - - - - - - - - -                   | 0   |
| Zuo1    | E A E K N V K T V D E S N V D P D E L L F D T E L A D E D L - - L T H D A R D W K T A D L Y A A M G L S K L               | 107 |
| DNAJC2  | E D K K E L S E E S E - - - - - - - - - - D E E L Q L E E F P M L K T L D P K D W K N Q D H Y A V L G L G H V             | 98  |
| Jj1     | - - - - - - - - - - - - - - - - - - - - - - - - - - - - - - - - - - - - - - - - - - - - - - - - - - - -                   | 11  |
| DNAJC21 | - - - - - - - - - - - - - - - - - - - - - - - - - - - - - - - - - - - - - - - - - - - - - - - - - - - -                   | 10  |
| Zuo1    | R F R A T E S Q I I K A H R K Q V V K Y H P D K Q S A A G G S L D Q - - D G F F K I I Q K A F E T L T D S N K             | 160 |
| DNAJC2  | R Y K A T Q R Q I K A A H K A M V L K Y H P D K R K A A G E P I K E G D N D Y F F T C I T K A Y E M L S D P V K           | 153 |
| Jj1     | E T H A S D L E L K K A Y R K K A L Q Y H P D K N P D N V E E A T Q K - - - F A V I R A A Y E V L S D P Q E               | 62  |
| DNAJC21 | R R D A S E E E L K K A Y R K L A L K W H P D K N L D N A A E A A E Q - - - F K L I Q A A Y D V L S D P Q E               | 61  |
| Zuo1    | R A Q Y D - - - - - - - - - - - - - - - - - - - - - - - - - - - - - - - - - - - - - - - - - - - - - - - - - - - -         | 177 |
| DNAJC2  | R R A F N - - - - - - - - - - - - - - - - - - - - - - - - - - - - - - - - - - - - - - - - - - - - - - - - - - - -         | 170 |
| Jj1     | R A W Y D S H K E Q I L N D T P P S T D D Y Y D Y E V D A T V T G V T T D E L L L F F N S A L Y T K I D N S A             | 117 |
| DNAJC21 | R A W Y D N H R E A L L - - - - - - - - - - - - - - - - - - - - - - - - - - - - - - - - - - - - - - - - - - - - - -       | 104 |
| Zuo1    | K G - T D Y D F Y E A W G P V F E A E A R F S K K - - - - - - - - - - - - - - - - - - - - - - - - - - - - - - - - -       | 201 |
| DNAJC2  | K S E A K D N F F E V F T P V F F E A E R N S R W S N K - - - - - - - - - - - - - - - - - - - - - - - - - - - - - - - - - | 195 |
| Jj1     | A G - - - - - I Y Q I A G K I F A K L A K D E I L S G K R L G K F S E Y Q D D V F E Q D I N S I G Y L K A C D             | 167 |
| DNAJC21 | K G - - - - - F Y T V Y R N V F E M I A K E E L E S - - - - - - - - - - - - - - - - - - - - - - - - - - - - - - - - -     | 125 |
| Zuo1    | - - - - - - - T P I P S L G N K D S S K K - E V E Q F Y A F W H R F D S W R T F E F L D E D V P D D S S N R               | 247 |
| DNAJC2  | - - - - - - - K N V P K L G G D M N S S F E - D V D I F Y S F W Y N F D S W R E F S Y L D E E E K E K A E C R             | 241 |
| Jj1     | N F I N K T D K L L Y P L F G Y S P T D Y E - Y L K H F Y K T W S A F N T L K S F S W K D R E Y M Y S K N Y D R           | 221 |
| DNAJC21 | - - V L E E E V D F P T F G D S Q S D Y D T V V H P F Y A Y W Q S F C T Q K N F A W K E E Y D T R Q A S N R               | 178 |
| Zuo1    | D H K R Y I E R K N K A A R D K K K T A D N A R L V K L V E R A V S E D P R I K M F K E E E K K E K E R R K W             | 302 |
| DNAJC2  | D E R R W I E K Q N R A T R A Q R K K E E M N R I R T L V D N A Y S C D P R I K K F K E E E K A K K - - - - -             | 291 |
| Jj1     | R T K R E V N R R N E K A R Q Q A R N E Y N K T V K R F V V F I K K L D K R M K E G A K I A E E Q R - - - - -             | 271 |
| DNAJC21 | W E K R A M E K E L N K K I R D K A R K E K N E L V R Q L V A F I R K R D K R V Q A H R K L V E E Q N - - - - -           | 228 |
| Zuo1    | E R E A G A R A E A E A K A K A E A E A K A K A E S E A K A N A S A K A D K - - - - - - - - - - - - - - - - - - - - -     | 341 |
| DNAJC2  | E A E K K A K A E A K R K E Q E A K E K Q R K N A E L E A A R L A K E K E E E - - - - - - - - - - - - - - - - - - - - -   | 339 |
| Jj1     | - - - - - - - - - - - - - - - - - - - - - - - - - - - - - - - - - - - - - - - - - - - - - - - - - - - -                   | 307 |
| DNAJC21 | - - - - - - - A E K A R K A E E M R R Q Q K L K Q A K L V E Q Y R E Q S - - - - - - - - - - - - - - - - - - - - -         | 266 |
| Zuo1    | K A K E A A K A A K K N K R A I R N S A K E A D Y F G - D A D K A T T I D E Q V G L I V D S L N - - - - -                 | 389 |
| DNAJC2  | K E K D I Q K K A I K K E R Q K L R N S C K T W N H F S D N E A E R V K M M E E V E K L C D R L E L A S L Q C             | 394 |
| Jj1     | - - - - - - - E E - - - N W D E L E K V Y D N F G - E F E N S K N D K E G E V L I Y E C F I C N - - - - -                 | 345 |
| DNAJC21 | E L Q E M E A R Y E K E F G D G S D E N E M E E H E L K D E E D G K D S D E A E D A E L Y D D L Y C P A C D K             | 321 |
| Zuo1    | - - - - - - - - - - - - - - - - - - - - - - - - - - - - - - - - - - - - - - - - - - - - - - - - - - - -                   | 413 |
| DNAJC2  | L N E T L T S C T K E V G K A A L E K Q I E E I N E Q I R K E E N - - - - - - - - - - - - - - - - - - - - -               | 435 |
| Jj1     | T F K S E K Q L K N H I N T K L H K K N M E E I R K E M E E E N I T L G L D N L S D L E K F D S A D E S V K E             | 400 |
| DNAJC21 | S F K T E K A M K N H E K S K K H R E M V A L L K Q Q L E E E E E N F S R P Q I D E N P L D D N S E E E M E D             | 376 |
| Zuo1    | S A K T I V D S G K - - - - - - - - - - - - - - - - - - - - - - - - - - - - - - - - - - - - - - - - - - - - - -           | 426 |
| DNAJC2  | A S K N T E K S T G G G G N G S K N W S E D D L Q L L I K A V N L F P A G - - - - - - - - - - - - - - - - - - - - -       | 472 |
| Jj1     | K E D I D L Q A L Q A E L A E I E R K L A E S S S E D E S E D D N L N I E M D I E V E D V S S D E N V H V N T             | 455 |
| DNAJC21 | A P K Q K L S K K Q - - - - - - - - - - - - - - - - - - - - - - - - - - - - - - - - - - - - - - - - - - - - - -           | 425 |
| Zuo1    | - - - - - - - - - - - - - - - - - - - - - - - - - - - - - - - - - - - - - - - - - - - - - - - - - - - -                   | 433 |
| DNAJC2  | - - - - - - - - - - - - - - - - - - - - - - - - - - - - - - - - - - - - - - - - - - - - - - - - - - - -                   | 517 |
| Jj1     | K N K K K R K K K K K A K V D T E T E E S E S F D D T K D K R S N E L D D L L A S L G D K G L Q T D D D E D W             | 510 |
| DNAJC21 | E S E H K C A K M L L E N R Q N Y D D N F N V N G P G E G V K V D P E D T N L N Q D S A K E L E D S P Q E N V             | 480 |
| Zuo1    | - - - - - - - - - - - - - - - - - - - - - - - - - - - - - - - - - - - - - - - - - - - - - - - - - - - -                   | 433 |
| DNAJC2  | N K - - - K A F D K F K K E H G V V P Q A D N A T P S E R F E G P Y T D F T P W T T E E Q K L L E Q A L K T               | 568 |
| Jj1     | S T - - - K - - - - - A K K K K G K Q P K K N S K S T K S - - - - - T P S L S - - - - - - - - - - - - - - - - -           | 536 |
| DNAJC21 | S V T E I I K P C D D P K S E A K S V P K P K G K T K - - - - - - - - - - - - - - - - - - - - - - - - - - - -             | 512 |
| Zuo1    | - - - - - - - - - - - - - - - - - - - - - - - - - - - - - - - - - - - - - - - - - - - - - - - - - - - -                   | 433 |
| DNAJC2  | Y P V N T P E R W E K I A E A V P G R T K K D C M K R Y K E L V E M V K A K K A A Q E Q V L N A S R A K K                 | 621 |
| Jj1     | - - - T L P S S M S P T S A I E V C T T C G E S F D S R N K L F N H V K I A G H A A V K N V V K R K K V K T K             | 588 |
| DNAJC21 | - P V R V P A E P Q T M S V L I S C T T C H S E F P S R N K L F D H L K A T G H A R A P S S S S L N S A T S S             | 566 |
| Zuo1    | - - - - - - - - - - - - - - - - - - - - - - - - - - - - - - - - - - - - - - - - - - - - - - - - - - - -                   | 433 |
| DNAJC2  | - - - - - - - - - - - - - - - - - - - - - - - - - - - - - - - - - - - - - - - - - - - - - - - - - - - -                   | 621 |
| Jj1     | R I                                                                                                                       | 590 |
| DNAJC21 | Q S K K E K R K N R                                                                                                       | 576 |

**Supplementary Fig. 1.** Zuo1 and Jj1 share a common region in addition to the J-domain. Sequence alignment of *S. cerevisiae* Zuo1, Jj1 and their *H. sapiens* homologs (DNAJC2 and DNAJC21, respectively) was done with ClustalW; identical residues are boxed. The conserved residues in the J-domain and Zuotin homology domain (ZHD) are indicated; the boundaries are arbitrarily set at the first and last identical residue in each region.

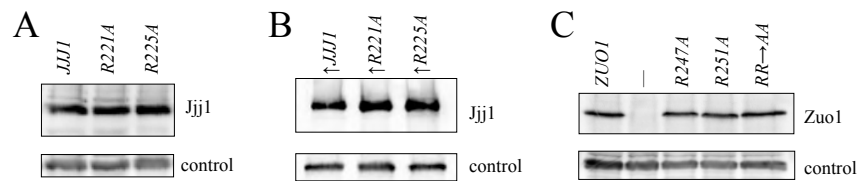

**Supplementary Fig. 2.** Expression levels of Zuo1 and Jjj1 variants in cell lysates. (A-C) Cell extracts were prepared from cultures of  $\Delta zuo1$  or  $\Delta jjj1$  cells expressing the indicated protein, and subjected to immunoblot analysis using antibody specific to either the Jjj1 C-terminus or to Zuo1, as well as antibody specific to Ssc1 as a loading control. A)  $\Delta jjj1$  cells containing plasmid encoding WT *JJJ1* or the indicated *JJJ1* mutant; extracts prepared from cultures used for serial dilutions shown in Fig. 1C. B)  $\Delta zuo1$  cells containing plasmid encoding WT *JJJ1* or the indicated *JJJ1* mutant expressed from the *GPDI* promoter ( $\uparrow$ ); extracts prepared from cultures used for serial dilutions shown in Fig. 1D. C)  $\Delta zuo1$  cells containing plasmid encoding WT *ZUO1*, no insert ( $\text{—}$ ) or the indicated *ZUO1* mutant (Zuo1<sub>R247,251A</sub> indicated by RR $\rightarrow$ AA); extracts prepared from cultures used for serial dilutions shown in Fig. 1E.

A

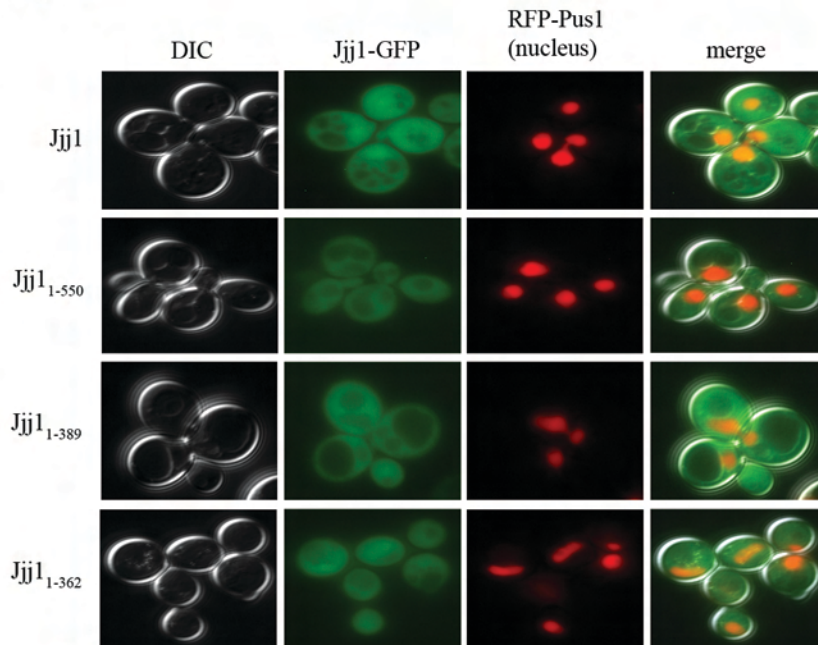

B

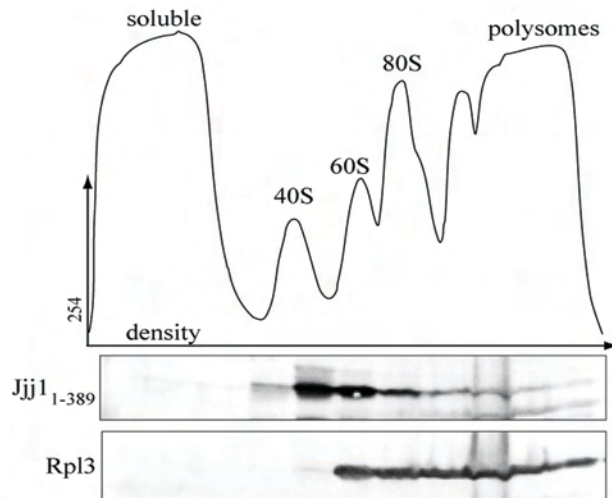

**Supplementary Fig. 3.** Analysis of cellular localization of Jjj1 C-terminal truncations. A)  $\Delta j j j 1$  cells expressing either Jjj1-GFP, Jjj1<sub>1-550</sub>-GFP, Jjj1<sub>1-389</sub>-GFP or Jjj1<sub>1-362</sub>-GFP from the native promoter, and the nucleus-specific protein RFP-Pus1 as a nuclear marker, were grown at 30°C prior to imaging by fluorescence and differential interference contrast (DIC) microscopy. Representative images show DIC, localization of Jjj1-GFP, Jjj1<sub>1-550</sub>-GFP, Jjj1<sub>1-389</sub>-GFP or Jjj1<sub>1-362</sub>-GFP as indicated, localization of RFP-Pus1 and an image overlay (merge). B) Lysates from  $\Delta j j j 1$  cells expressing Jjj1<sub>1-389</sub> from the native promoter was centrifuged through a sucrose gradient to separate ribosomal subunits, monosomes and polysomes and fractions were collected. Upper, absorbance at 254 nm plotted versus the relative time of fraction collection (density). Lower, fractions were analyzed by immunoblotting using antibodies specific for the N-terminus of Jjj1 and Rpl3.

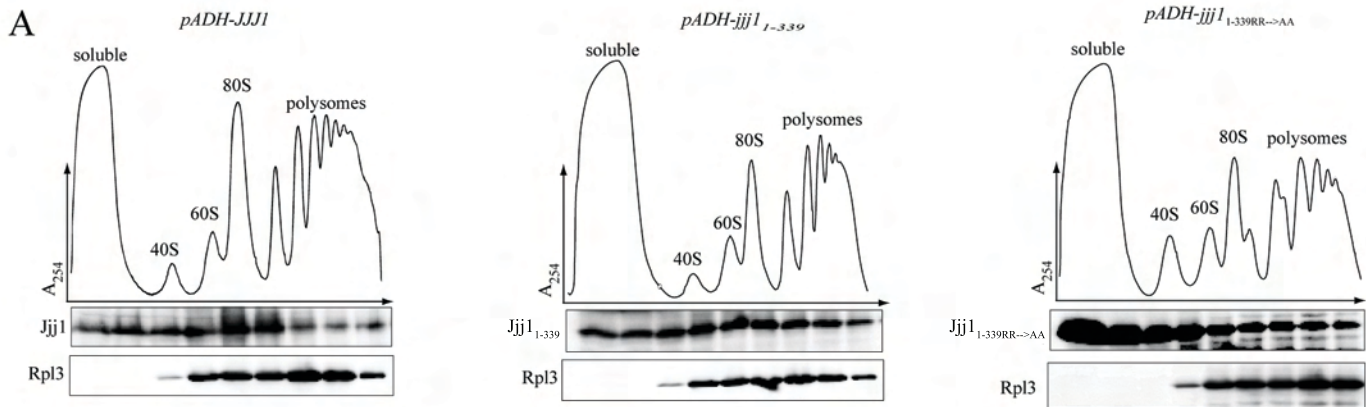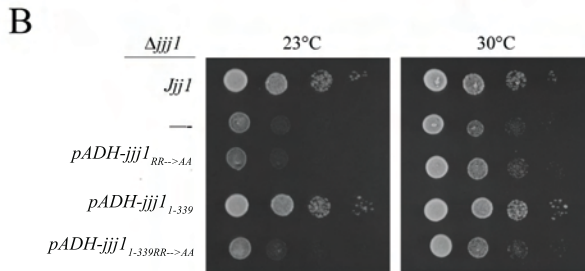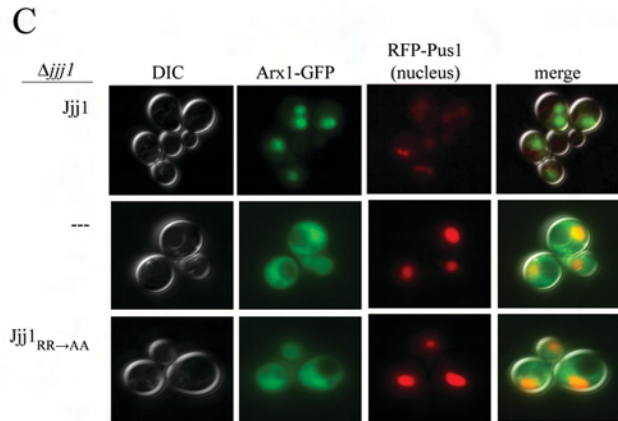

**Supplementary Fig.4.** A,B) Overexpression of Jjj1 variants. A) Lysate from  $\Delta jjj1$  cells expressing either wild-type Jjj1, Jjj1<sub>1-339</sub> or Jjj1<sub>1-339RR->AA</sub> from the *ADH1* promoter (*pADH*) was centrifuged through a sucrose gradient to separate ribosomal subunits, monosomes and polysomes and fractions were collected. Upper, absorbance at 254 nm plotted versus the relative time of fraction collection (density). Lower, fractions were analyzed by immunoblotting using antibodies specific for the N-terminus of Jjj1 and Rpl3. B)  $\Delta jjj1$  cells containing plasmid encoding WT *JJJ1*, or the indicated *JJJ1* mutant expressed from the *ADH1* promoter (*pADH*), were serially diluted, spotted on minimal medium plates, and then incubated at 23°C for 3 days or 30°C for 2 days. C) Analysis of Arx1 localization in *jjj1<sub>RR->AA</sub>* cells.  $\Delta jjj1$  *ARX1-GFP* cells containing empty vector (---), or expressing Jjj1 or Jjj1<sub>RR->AA</sub> from the native promoter, were grown to an OD<sub>600</sub> of 0.5-0.7 at 23°C prior to imaging by fluorescence and differential interference contrast (DIC) microscopy. Representative images show DIC, Arx1-GFP localization, localization of a nucleus-specific RFP fusion protein, RFP-Pus1, and an image overlay (merge).

**Supplementary Table 1.** Yeast plasmids used in this study.

| Plasmid               | Description                                                                                                                    | Reference                 |
|-----------------------|--------------------------------------------------------------------------------------------------------------------------------|---------------------------|
| pRS316                | URA3 yeast centromeric vector                                                                                                  | Sikorski and Hieter, 1989 |
| pRS315                | LEU2 yeast centromeric vector                                                                                                  | Sikorski and Hieter, 1989 |
| pRS316Zuo1            | pRS316 carrying complete <i>ZUO1</i> gene under control of the native <i>ZUO1</i> promoter                                     | Yan, 1998                 |
| pRS316Jjj1            | pRS316 carrying complete <i>JJJ1</i> gene under control of the native <i>JJJ1</i> promoter                                     | Meyer, 2007               |
| pRS316Zuo1R247Aa      | pRS316Zuo1 with R247 substituted to alanine                                                                                    | This study                |
| pRS316Zuo1R251Aa      | pRS316Zuo1 with R251 substituted to alanine                                                                                    | This study                |
| pRS316Jjj1R221Ab      | pRS316Jjj1 with R221 substituted to alanine                                                                                    | This study                |
| pRS316Jjj1R225Ab      | pRS316Jjj1 with R225 substituted to alanine                                                                                    | This study                |
| pRS316Zuo1RR→AA       | pRS316Zuo1 with R247 and R251 substituted to alanine                                                                           | This study                |
| pRS316Jjj1RR→AA       | pRS316Jjj1 with R221 and R225 substituted to alanine                                                                           | This study                |
| pRS415GPDJjj1         | pRS415 carrying complete <i>JJJ1</i> gene under control of the <i>GPD1</i> promoter                                            | Meyer, 2007               |
| pRS415GPDJjj1R221A    | pRS415GPDJjj1 with R221 substituted to alanine                                                                                 | This study                |
| pRS415GPDJjj1R225A    | pRS415GPDJjj1 with R225 substituted to alanine                                                                                 | This study                |
| pRS316Jjj1 1-339      | pRS316Jjj1 with residues 340-590 deleted                                                                                       | This study                |
| pRS316Jjj1 1-339RR→AA | pRS316Jjj1ΔC with R221 and R225 substituted to alanine                                                                         | This study                |
| pRS415GPDJjj1 1-339   | pRS415GPDJjj1 with residues 340-590 deleted                                                                                    | This study                |
| pRS315Jjj1            | pRS315 carrying complete <i>JJJ1</i> gene under control of the native <i>JJJ1</i> promoter, cloned using BamHI and XbaI sites  | This study                |
| pRS315Jjj1 1-339      | pRS315Jjj1 with residues 340-590 deleted                                                                                       | This study                |
| pRS415CYCJjj1 1-339   | pRS415 carrying <i>JJJ1</i> with codons for residues 340-590 deleted, under control of a weak (truncated) <i>CYC1</i> promoter | This study                |
| pRS415ADHJjj1 1-339   | pRS415 carrying <i>JJJ1</i> with codons for residues 340-590 deleted, under control of the <i>ADH1</i> promoter                | This study                |
| pRS316Jjj1 1-362      | pRS316Jjj1 with residues 363-590 deleted                                                                                       | This study                |
| pRS316Jjj1 1-389      | pRS316Jjj1 with residues 390-590 deleted                                                                                       | This study                |
| pRS316Jjj1 1-550      | pRS316Jjj1 with residues 551-590 deleted                                                                                       | This study                |
| pRS316Jjj1-GFP        | pRS316Jjj1 carrying the <i>GFP</i> gene ( <i>A. victoria</i> ) cloned into the 3' BamHI site                                   | This study                |
| pRS316Jjj1 1-339-GFP  | pRS316Jjj1-GFP with codons for Jjj1 residues 340-590 deleted                                                                   | This study                |
| pRS316Jjj1 1-362-GFP  | pRS316Jjj1-GFP with codons for Jjj1 residues 363-590 deleted                                                                   | This study                |
| pRS316Jjj1 1-389-GFP  | pRS316Jjj1-GFP with codons for Jjj1 residues 390-590 deleted                                                                   | This study                |
| pRS316Jjj1 1-550-GFP  | pRS316Jjj1-GFP with codons for Jjj1 residues 551-590 deleted                                                                   | This study                |
| pRS313RFP-PUS1        | pRS313 ( <i>HIS3</i> yeast centromeric vector) carrying <i>RFP-PUS1</i> fusion gene                                            | Han, 2007                 |
| pRS317RFP-PUS1        | RFP-PUS1 cloned into pRS317 using SacI and Sall sites                                                                          | This study                |

<sup>a</sup> These plasmids are representative of other plasmids in Fig. 1B carrying single codon substitutions in *ZUO1* and were constructed in the same manner, in the same vector.

<sup>b</sup> These plasmids are representative of other plasmids in Fig. 1C carrying single codon substitutions in *JJJ1* and were constructed in the same manner, in the same vector.

#### References for Supplementary Table 1.

G.S. Han, S. Siniosoglou, G.M. Carman, The cellular functions of the yeast lipin homolog PAH1p are dependent on its phosphatidate phosphatase activity, *The Journal of biological chemistry*, 282 (2007) 37026-37035.

A.E. Meyer, Hung, N. J., Yang, P., Johnson A. W. & Craig, E. A, The Specialized Cytosolic J-protein Jjj1, Functions in 60S Ribosomal Subunit Biogenesis, *Proc. Natl. Acad. Sci. USA*, 104(5):1558-63 (2007).

R.S. Sikorski, P. Hieter, A system of shuttle vectors and yeast host strains designed for efficient manipulation of DNA in *Saccharomyces cerevisiae*, *Genetics*, 122 (1989) 19-27.

W. Yan, B. Schilke, C. Pfund, W. Walter, S. Kim, E.A. Craig, Zuo1in, a ribosome-associated DnaJ molecular chaperone, *Embo J*, 17 (1998) 4809-4817.
